# Supplementary material for: Stabilisation of transition states prior to and following eudesmane cation in aristolochene synthase
Source: Royal Society of Chemistry journal article supplement (doi:10.1039/b604147g), 2006-01-01
Supplement: b604147g.pdf [file b604147g.pdf]

**Electronic Supplementary Information for**

**Stabilisation of transition states prior to and following eudesmane cation in  
aristolochene synthase**

Silvia Forcat & Rudolf K. Allemann\*

School of Chemistry

Cardiff University

Main Building

Park Place

Cardiff, CF10 3AT (United Kingdom)

Fax: (+44)-29-2087-4030

E-mail: [allemannrk@cf.ac.uk](mailto:allemannrk@cf.ac.uk)

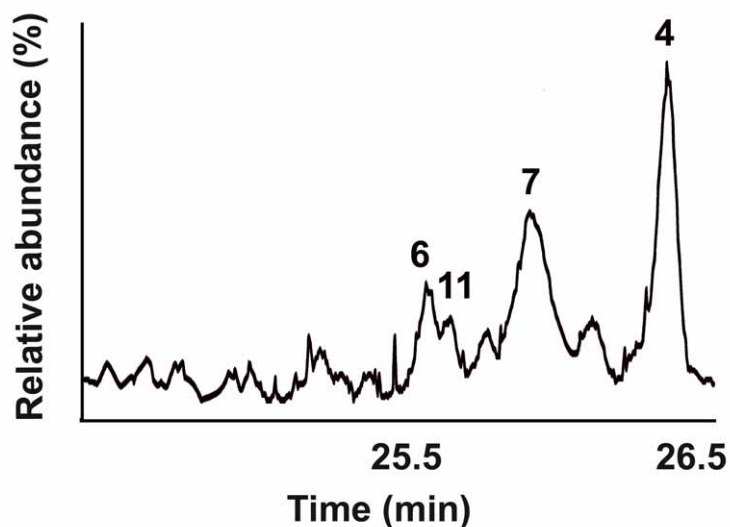

**Fig. 1S:** Total Ion Chromatogram of AS-F178C.

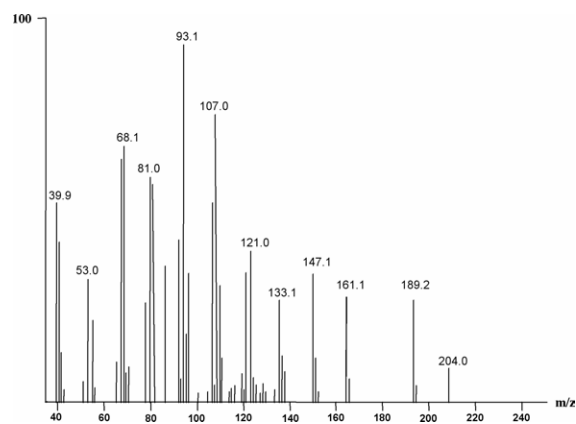

**Fig. 2S:** MS of germacrene A (4) produced by AS-F178C

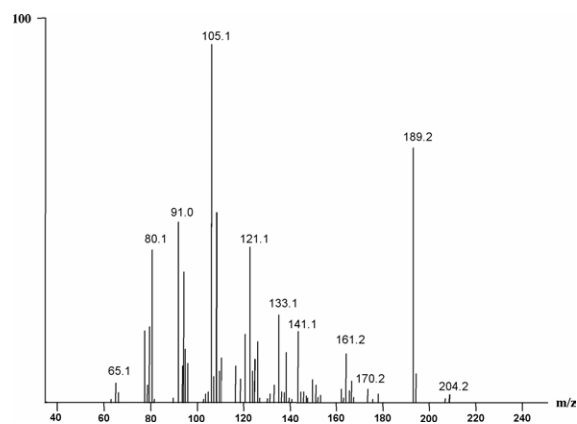

**Fig 3S:** MS of aristolochene (6) produced by AS-F178C

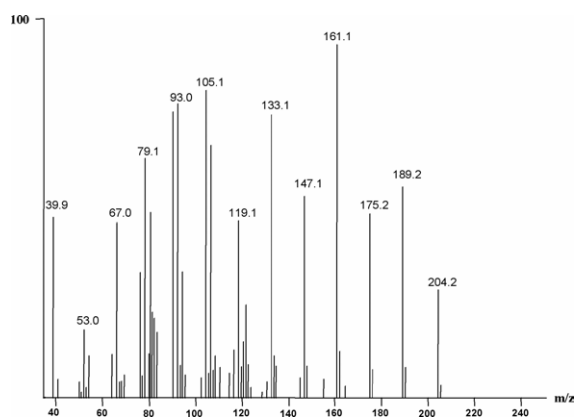

**Fig 4S:** MS of valencene (7) produced by AS-F178C

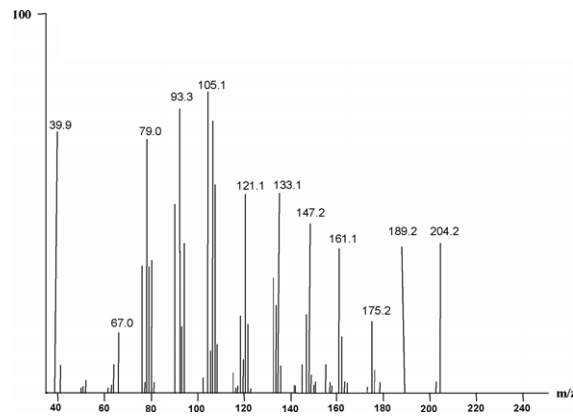

**Fig 5S:** MS of  $\beta$ -selinene (11) produced by AS-F178C

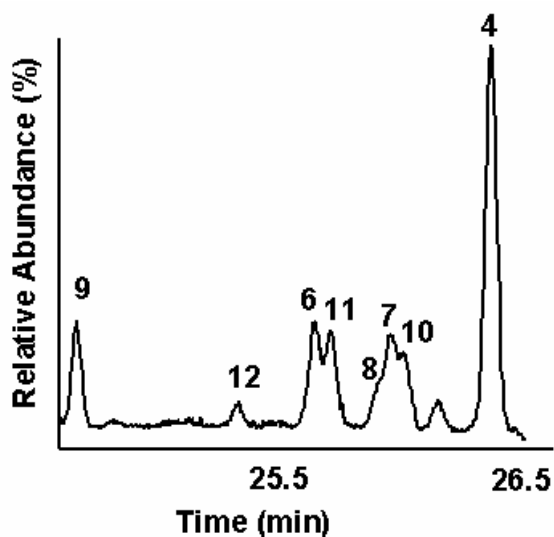

**Fig. 6S:** TIC of AS-F178V. All data for AS-F178V is from Forcat & Allemann, 2004.<sup>1</sup>

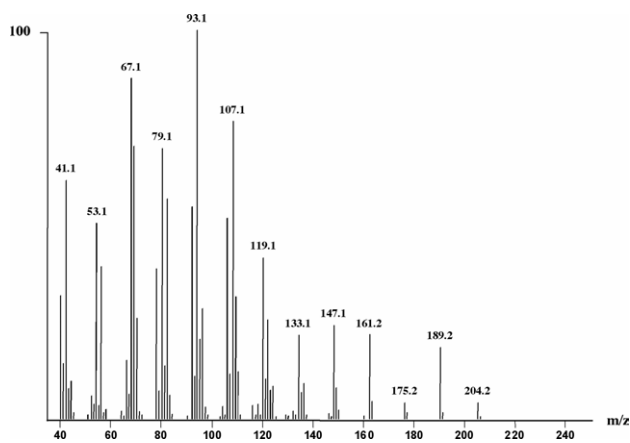

**Fig. 7S:** MS of germacrene A (4) produced by AS-F178V

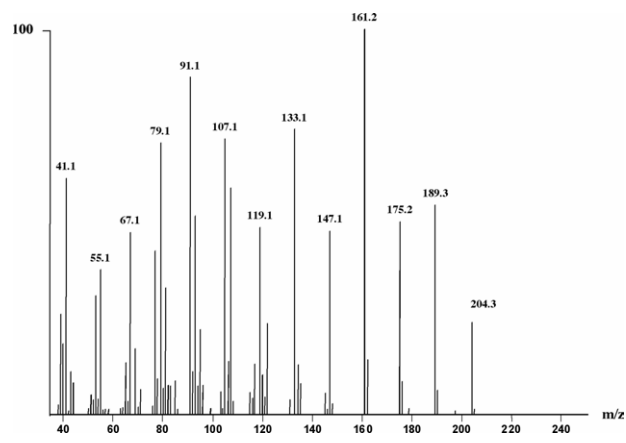

**Fig 8S:** MS of valencene (7) produced by AS-F178V

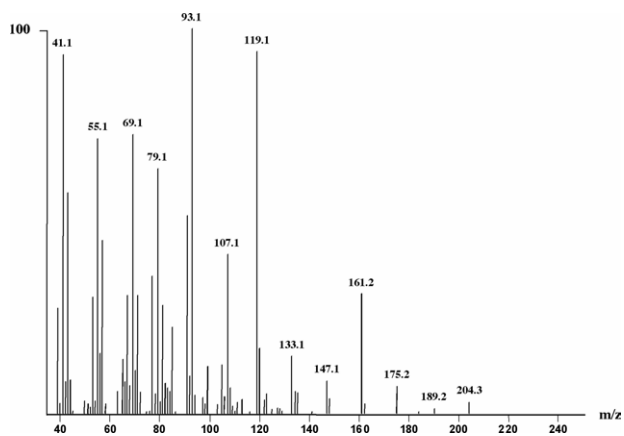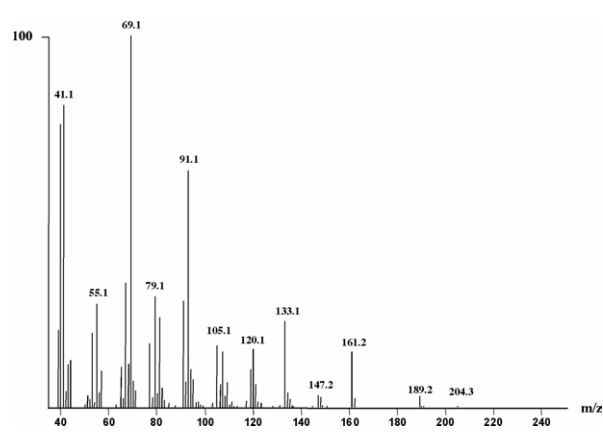

**Fig 10S:** MS of  $\beta$ -farnesene (9) produced by AS-F178V

100 -

**Fig 9S:** MS of  $\alpha$ -farnesene (**8**) produced by AS-F178V

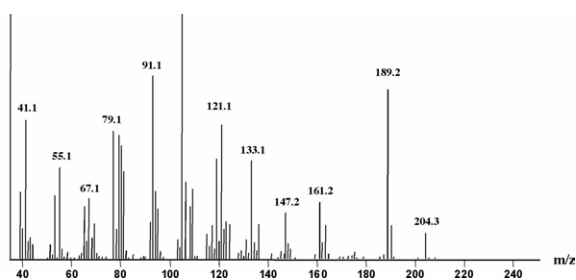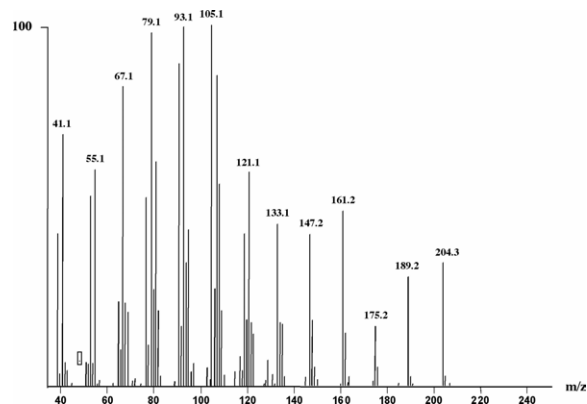

**Fig 11S:** MS of  $\alpha$ -selinene (**10**) produced by AS-F178V

**Fig 12S:** MS of  $\beta$ -selinene (**11**) produced by AS-F178V

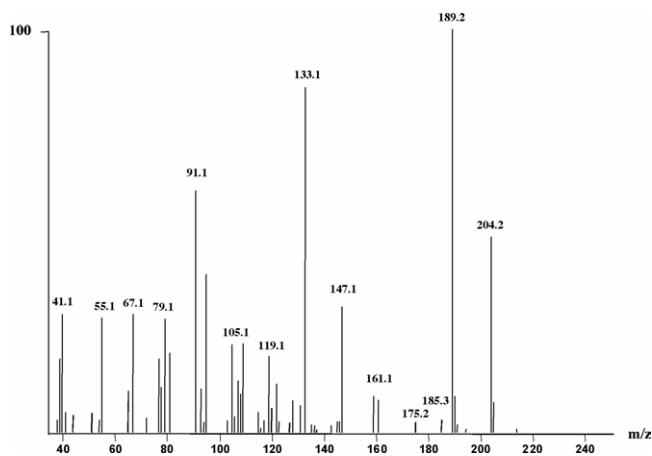

**Fig. 13S:** MS of selina-4,11-diene (**12**) produced by AS-F178V

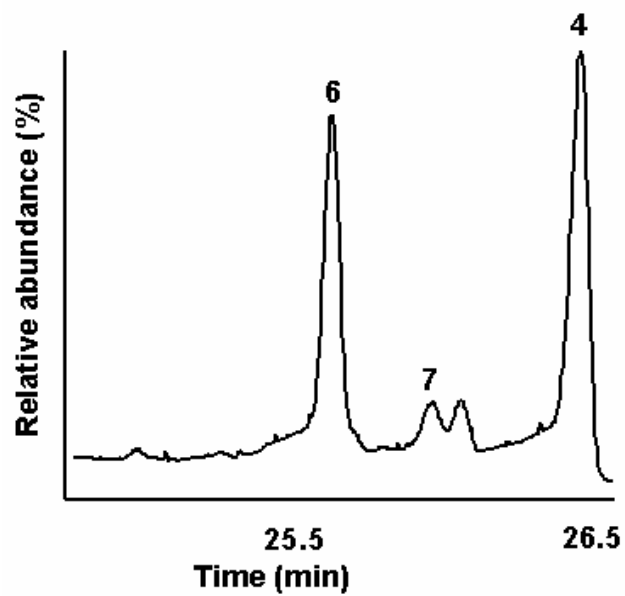

Fig. 14S: TIC of AS-F178I

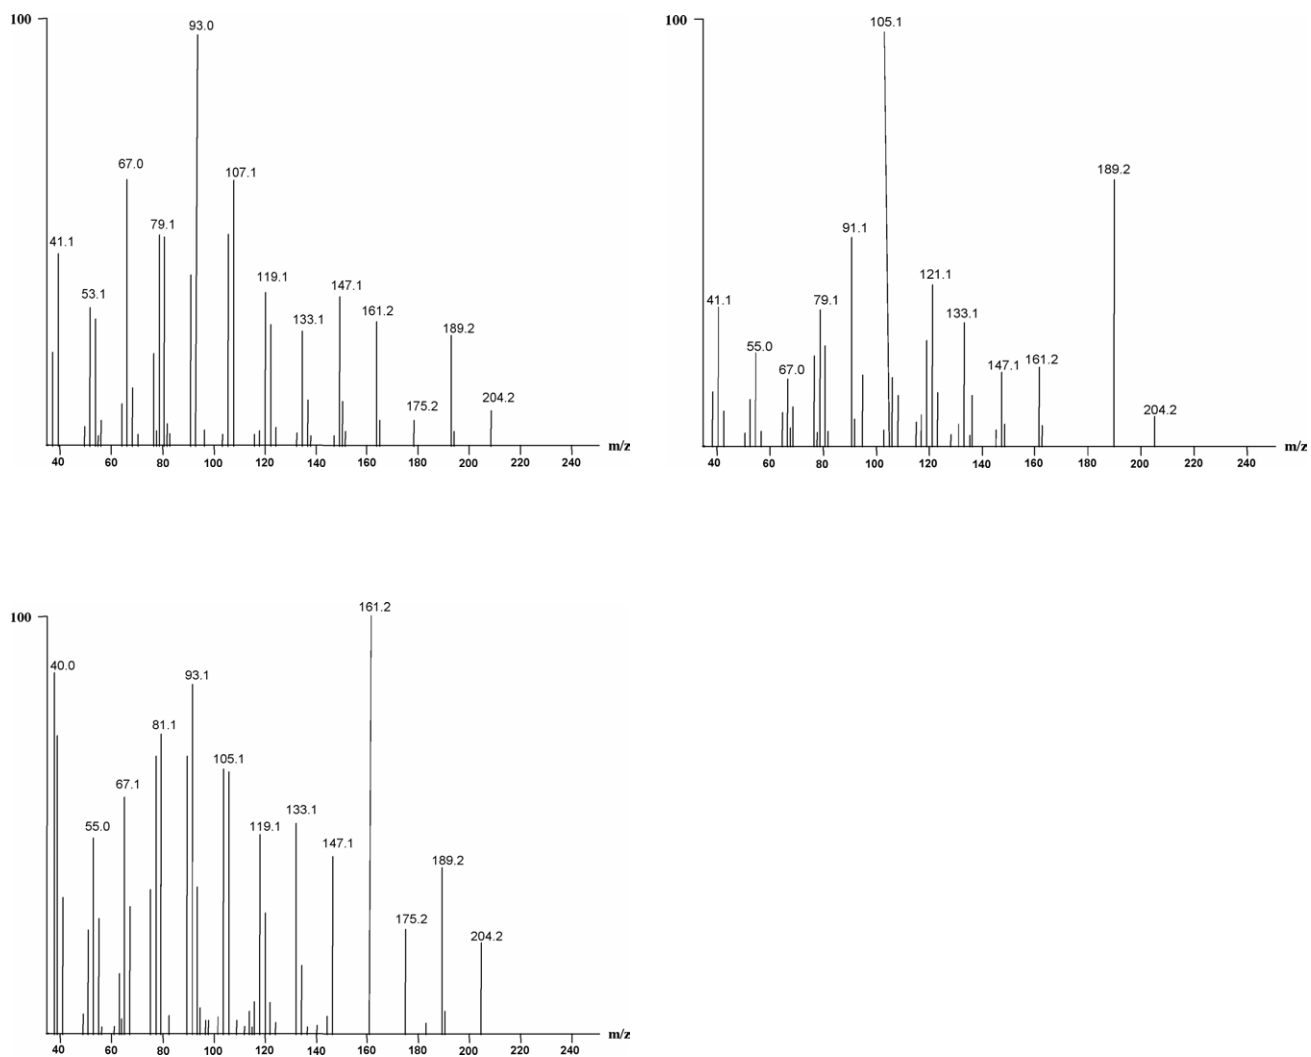

**Fig 17S:** MS of valencene (7) produced by AS-F178I

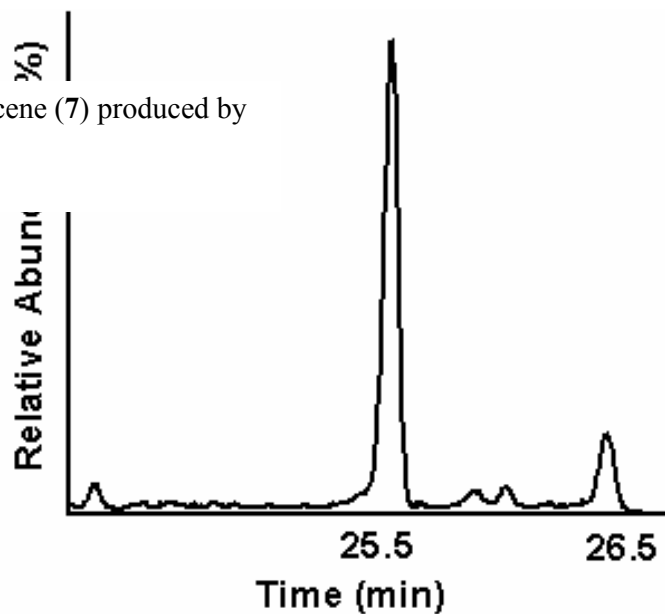

**Fig. 18S:** TIC of AS-F178Y.

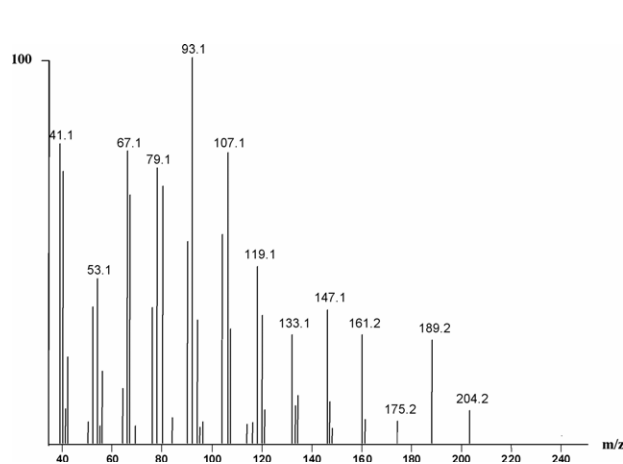

**Fig. 19S:** MS of germacrene A (4) produced by AS-F178Y

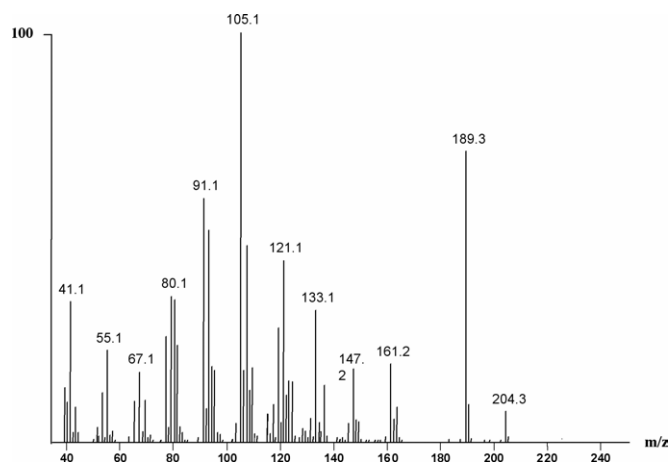

**Fig 20S:** MS of aristolochene (6) produced by AS-F178Y

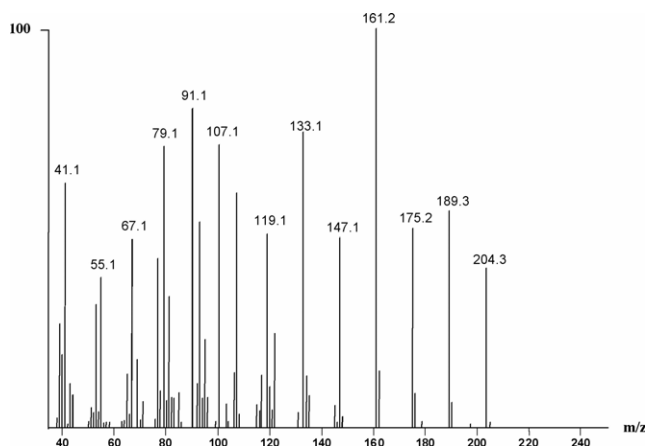

**Fig. 21S:** MS of valencene (7) produced by AS-F178Y

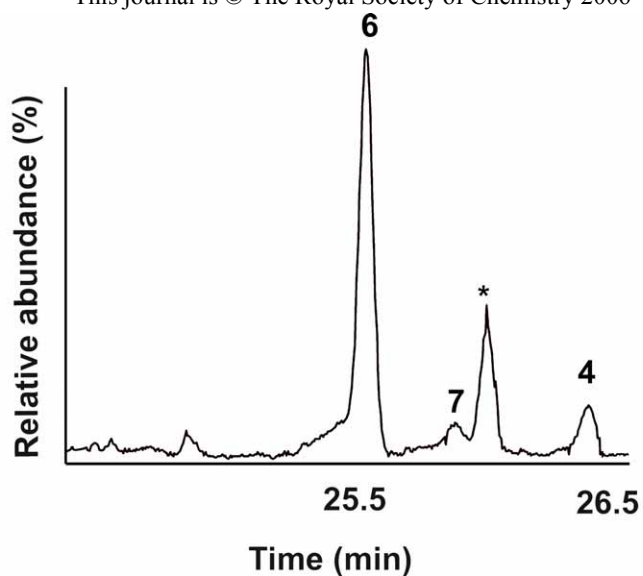

**Fig. 22S:** TIC of AS-F178W. \* represents a non-terpene contaminant.

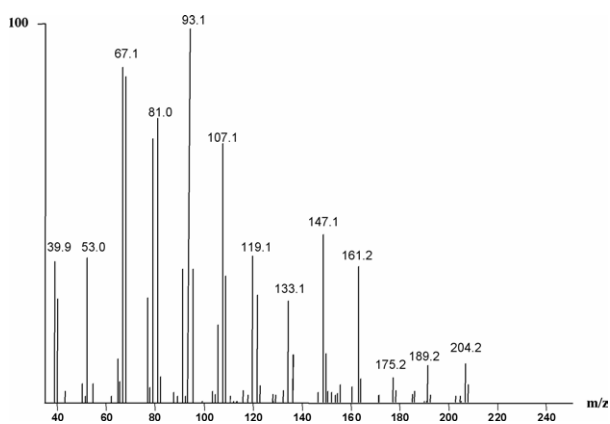

**Fig. 23S:** MS of germacrene A (4) produced by AS-F178W

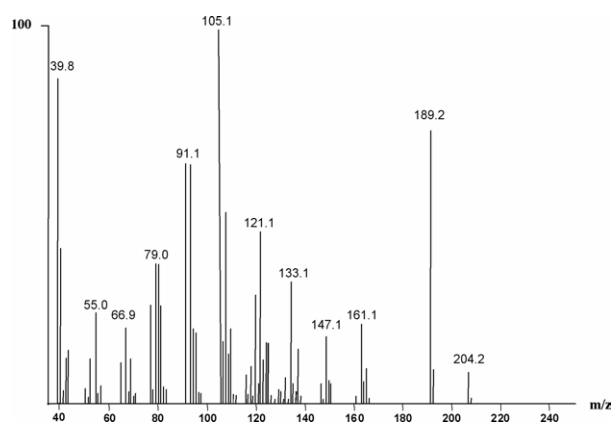

**Fig 24S:** MS of aristolochene (6) produced by AS-F178W

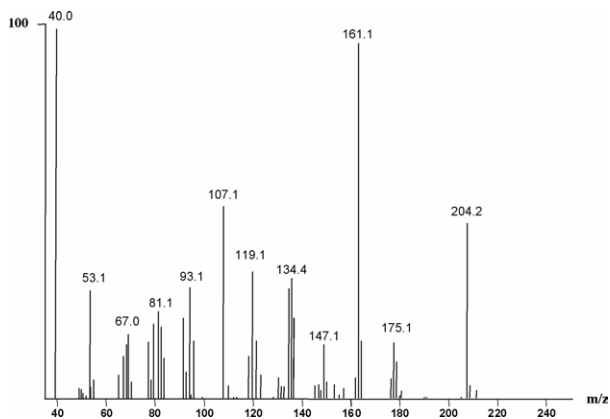

**Fig 25S:** MS of valencene (7) produced by AS-F178W

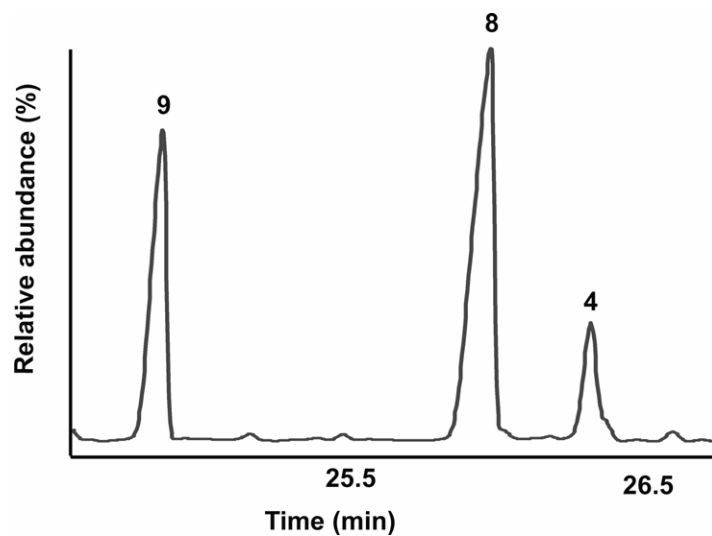

**Fig. 26S:** TIC of AS-F112A

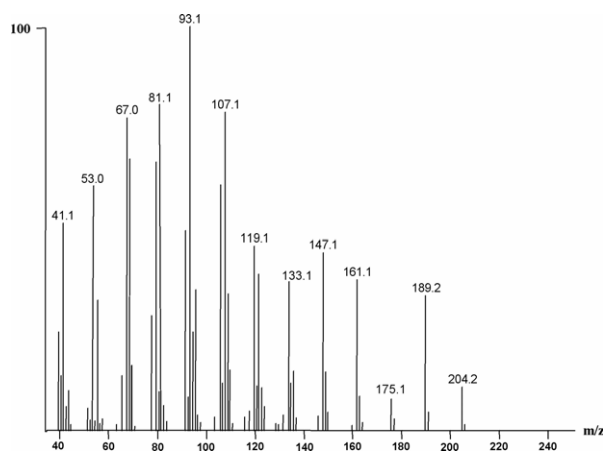

**Fig. 27S:** MS of germacrene A (4) produced by AS-F112A

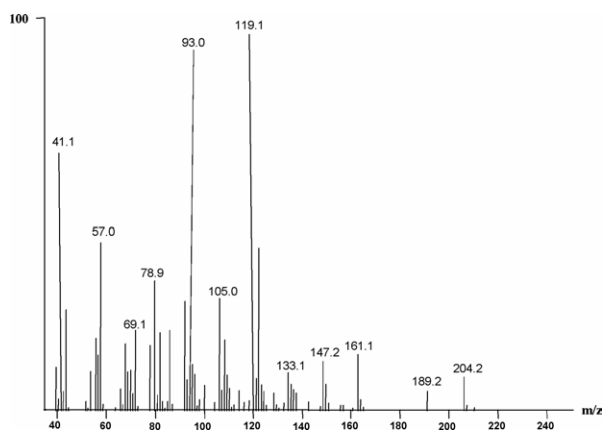

**Fig 28S:** MS of  $\alpha$ -farnesene (8) produced by AS-F112A

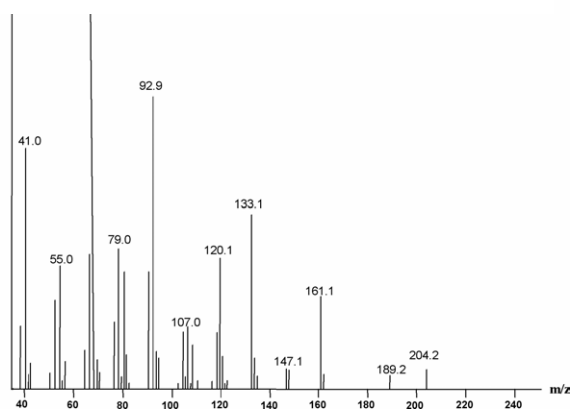

**Fig 29S:** MS of  $\beta$ -farnesene (9) produced by AS-F112A



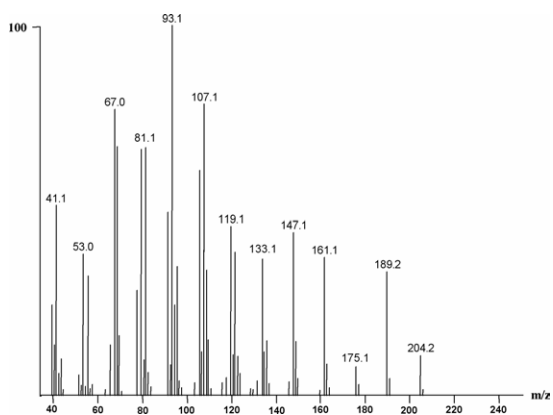

**Fig. S30:** Standard of germacrene A, **4**.

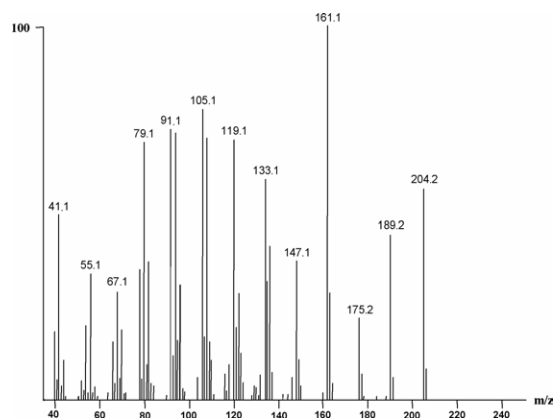

**Fig. S31:** Standard of valencene, **7**.

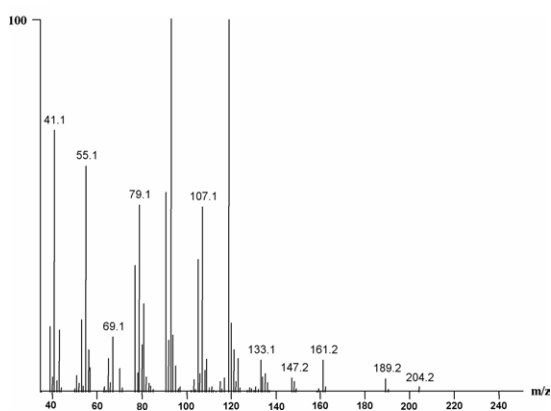

**Fig. S32:** Standard of  $\alpha$ -farnesene, **8**.

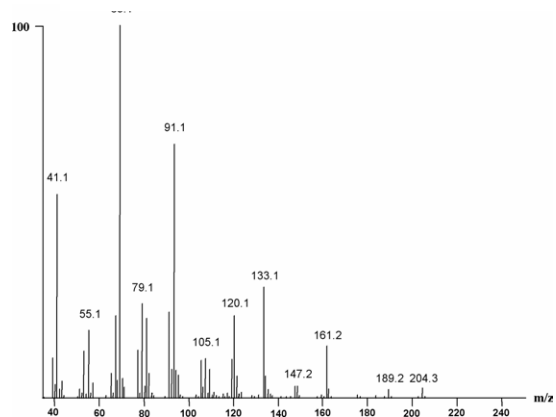

**Fig. S33:** Standard of  $\beta$ -farnesene, **9**.

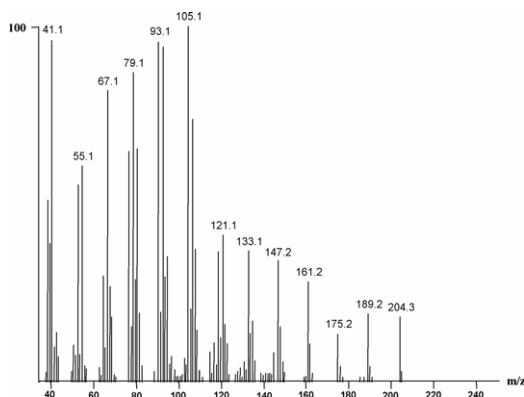

**Fig. S34:** Standard of  $\beta$ -selinene (**11**).

For standards **10** and **12**, see Forcat & Allemann, 2004.<sup>1</sup>

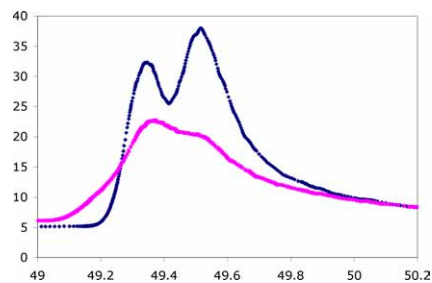

**Fig. S35:** Determination of the absolute configuration of germacrene A produced by AS-F112A. --- GC- trace of a racemic mixture of  $\beta$ -elemenes. --- GC- trace of a co-injection of racemic  $\beta$ -elemenes and the  $\beta$ -elemene produced from FPP by AS-F112A.

**References for ESI**

1. S. Forcat and R. K. Allemann, *Chem. Commun.*, 2004, 2094-2095.
2. M. J. Calvert, P. R. Ashton and R. K. Allemann, *Journal of the American Chemical Society*, 2002, **124**, 11636-11641.
3. M. J. Calvert, S. E. Taylor and R. K. Allemann, *Chemical Communications*, 2002, 2384-2385.
